# Supplementary material for: Patterns of Hearing Loss in Irradiated Survivors of Head and Neck Rhabdomyosarcoma
Source: MDPI journal article supplement (doi:10.3390/cancers14235749), 2022-11-23
Supplement: s1 [file s1]

Table S1. Ototoxicity classification systems

| <b>Grade</b> | <b>SIOP</b>                             | <b>Muenster</b>                       | <b>CTCAEv4.03</b>                            |
|--------------|-----------------------------------------|---------------------------------------|----------------------------------------------|
| 0            | ≤20 dB HL at all frequencies            | ≤10 dB HL at all frequencies          | <20 dB HL at all frequencies                 |
| 1            | > 20 dB HL SNHL at > 4 kHz              | > 10 dB HL ≤20 dB HL at any frequency | > 20 dB HL at 8 kHz                          |
| 2 (a)        | > 20 dB HL SNHL at 4 kHz and above      | >20 dB HL ≤ 40 dB HL at ≥4 kHz        | > 20 dB HL at 4 kHz and above                |
| 2 b          |                                         | >40 dB HL ≤ 60 dB HL at ≥4 kHz        |                                              |
| 2 c          |                                         | >60 dB HL at ≥4 kHz                   |                                              |
| 3 (a)        | > 20 dB HL SNHL at 2 or 3 kHz and above | >20 dB HL ≤ 40 dB HL at <4 kHz        | > 20 dB HL at 3 kHz and above                |
| 3 b          |                                         | >40 dB HL ≤ 60 dB HL at <4 kHz        |                                              |
| 3 c          |                                         | >60 dB HL < 80 dB HL at <4 kHz        |                                              |
| 4            | > 40 dB HL SNHL at 2 kHz and above      | ≥80 dB at <4 khz                      | Audiological indication for cochlear implant |

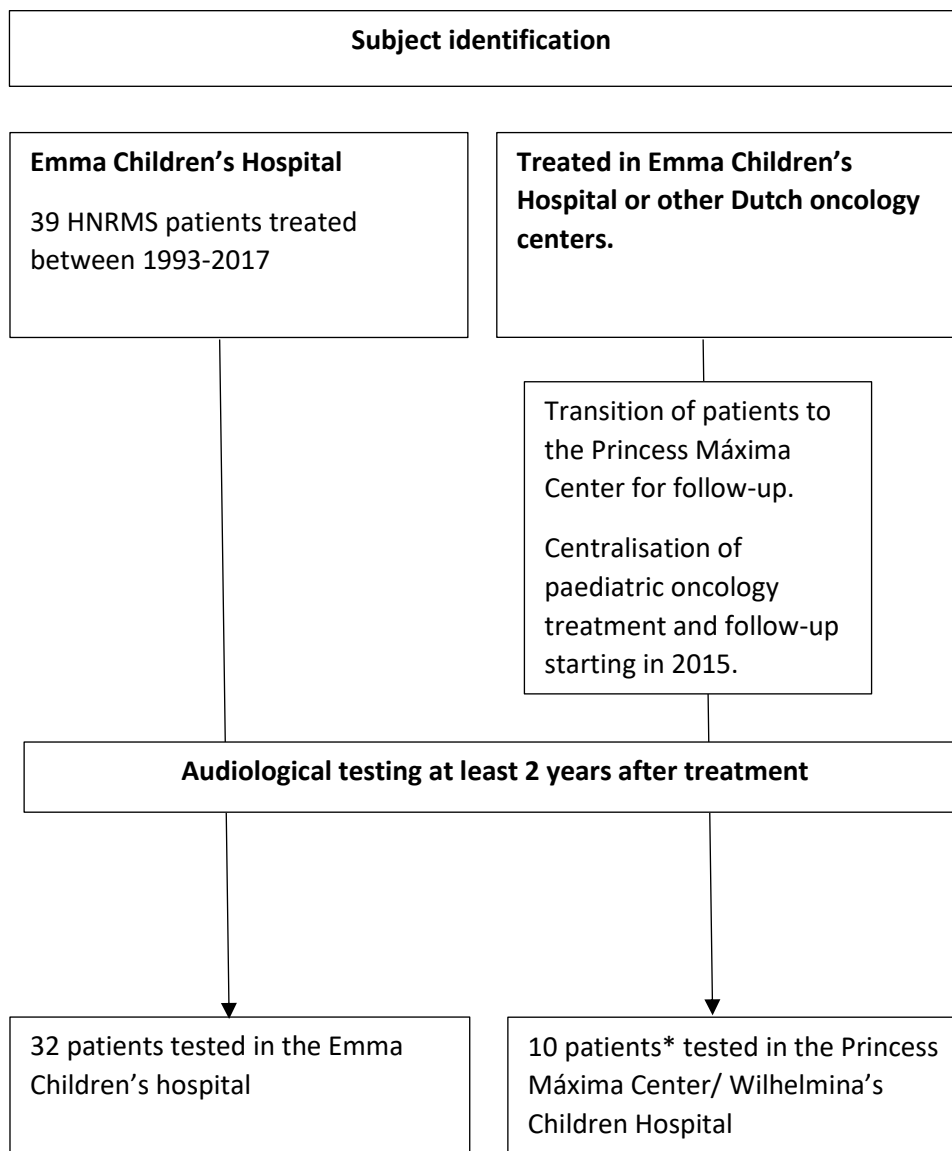

**Figure S1.** Subject identification flow diagram.

\*6 patients were treated in the Emma Children's hospital, 3 at the Sophia's Children hospital and 1 at the University Medical Center Groningen.
